# 1 **High-throughput multiplexed tandem repeat genotyping using targeted** 2 **long-read sequencing**

3  
4 Devika Ganesamoorthy<sup>1#</sup>, Mengjia Yan<sup>1</sup>, Valentine Murigneux<sup>1</sup>, Chenxi Zhou<sup>1</sup>, Minh Duc  
5 Cao<sup>1</sup>, Tania PS Duarte<sup>1</sup> and Lachlan JM Coin<sup>1#</sup>.

6  
7 <sup>1</sup>Institute for Molecular Bioscience, The University of Queensland, Brisbane, QLD 4072,  
8 Australia

9  
10 <sup>#</sup> Correspondence to Dr. Devika Ganesamoorthy or Prof. Lachlan JM Coin

11 Dr. Devika Ganesamoorthy

12 Institute for Molecular Bioscience

13 The University of Queensland, Brisbane, QLD 4072, Australia

14 [d.ganesamoorthy@imb.uq.edu.au](mailto:d.ganesamoorthy@imb.uq.edu.au)

15 Prof. Lachlan JM Coin

16 Institute for Molecular Bioscience

17 The University of Queensland, Brisbane, QLD 4072, Australia

18 [l.coin@imb.uq.edu.au](mailto:l.coin@imb.uq.edu.au)

19  
20 Running title: Targeted long-read sequencing of tandem repeats

21 Keywords: Tandem repeats, targeted sequencing, long-read sequencing

22

## 23     **ABSTRACT**

24     Tandem repeats (TRs) are highly prone to variation in copy numbers due to their repetitive and  
25     unstable nature, which makes them a major source of genomic variation between individuals.  
26     However, population variation of TRs have not been widely explored due to the limitations of  
27     existing tools, which are either low-throughput or restricted to a small subset of TRs. Here, we  
28     used SureSelect targeted sequencing approach combined with Nanopore sequencing to  
29     overcome these limitations. We achieved an average of 3062-fold target enrichment on a panel  
30     of 142 TR loci, generating an average of 97X sequence coverage on 7 samples utilizing 2  
31     MinION flow-cells with 200ng of input DNA per sample. We identified a subset of 110 TR loci  
32     with length less than 2kb, and GC content greater than 25% for which we achieved an average  
33     genotyping rate of 75% and increasing to 91% for the highest-coverage sample. Alleles  
34     estimated from targeted long-read sequencing were concordant with gold standard PCR sizing  
35     analysis and moreover highly correlated with alleles estimated from whole genome long-read  
36     sequencing. We demonstrate a targeted long-read sequencing approach that enables  
37     simultaneous analysis of hundreds of TRs and accuracy is comparable to PCR sizing analysis.  
38     Our approach is feasible to scale for more targets and more samples facilitating large-scale  
39     analysis of TRs.

40

## 41 INTRODUCTION

42 Repeated sequences occur in multiple copies throughout the genome, and they make up  
43 almost half of the human genome [1]. Repeat sequences can be divided into two categories,  
44 namely interspersed repeats and tandem repeats (TRs). Interspersed repeats are scattered  
45 throughout the genome and are remnants of transposons [2]. TRs consists of repeat units that  
46 are located adjacent to each other (*i.e.* in tandem). There are almost 1 million TRs in the  
47 human genome covering 10.6% of the entire genome [3]. TRs can be further divided into two  
48 types based on the length of the repeat unit; repeats with one to six base pair repeat units are  
49 classified as microsatellites or short tandem repeats (STRs) and those with more than six base  
50 pair repeat units are known as minisatellites [4].

51

52 TRs are prone to high rates of copy number variation and mutation due to the repetitive  
53 unstable nature, which makes them a major source of genomic variation between individuals.  
54 Variation in TRs may explain some of the phenotypic variation observed in complex diseases  
55 as it is poorly tagged by single nucleotide variation [5, 6]. Recent studies have shown that 10%  
56 to 20% of coding and regulatory regions contain TRs and suggested that variations in TRs  
57 could have phenotypic effect [7]. Although TRs represent a highly variable fraction of the  
58 genome, analysis of TRs so far are limited to known pathogenic regions, mainly STRs due to  
59 the limitations in analysis techniques.

60

61 Traditionally, TR analysis has been carried out via restriction fragment length polymorphism  
62 (RFLP) analysis [8] or PCR amplification of the target loci followed by fragment length

analysis [9]. These techniques are only applicable to a specific target region and not scalable to high-throughput analysis, which limits the possibility of genome-wide TR analysis. In the recent decade, significant progress has been made in utilising high throughput short-read sequencing data for genotyping STRs [10]. Our group and others have also demonstrated targeted sequencing approaches using short-read sequencing for TR analysis [11, 12]. Several computational tools have been developed to improve the accuracy of TR genotyping from short-read sequencing data with varying performance [13-19]. Yet, most of these tools have focused mainly on the analysis of STRs and analysis of longer TRs remains a hurdle for these approaches. We reported GtTR in Ganesamoorthy *et. al.* (2018) [12], which utilizes short-read sequencing data to genotype longer TRs. GtTR reports absolute copy number of the TRs, but it does not report the exact genotype of two alleles due to the use of short-read sequencing data.

Sequencing reads that span the entire repeat region are informative to accurately genotype TRs [11], and therefore are ideal for genome-wide TR analysis. Long-read sequencing technologies have the potential to span all TRs in human genome, including long TRs. There have been few reports on the use of long-read sequencing for the analysis of specific TRs implicated in diseases [20-22]. Genotyping tools utilizing long-read sequencing data, such as Nanosatellite[21], RepeatHMM [23] and Tandem-genotypes [24] have been reported in the recent years with varying performance across different length of repeat units and repeat length. We reported VNTRTyper in Ganesamoorthy *et. al.* (2018) [12] to genotype TRs from long-read whole genome sequencing data. Despite the availability of genotyping tools,

85 long-read sequencing is not widely used for TR analysis, due to the high costs associated with  
86 whole genome long-read sequencing. Cost-effective long-read sequencing approaches will be  
87 an important and attractive option to genotype TRs in large-scale studies. However, there has  
88 been limited progression on targeted long-read sequencing of TRs.

89

90 We have previously demonstrated that targeted sequence capture of repetitive TR sequences  
91 are feasible using short-read sequencing technologies [12]. In this study, we demonstrate the  
92 targeted sequence capture of repetitive TRs using Oxford Nanopore long-read sequencing  
93 technologies. There have been previous reports on the use of targeted sequencing combined  
94 with long read sequencing technologies [25], however enrichment of repeat sequences  
95 requires optimization in probe design and probe hybridization approaches. We optimized the  
96 protocols and report successful enrichment of repetitive sequences followed by long-read  
97 sequencing. We demonstrate the accuracy of genotype estimates from targeted long-read  
98 sequencing by comparison with gold-standard PCR sizing analysis. In this study, we  
99 predominantly targeted longer TRs (i.e. minisatellites), however our approach is applicable to  
100 all TRs. Our targeted long-read sequencing method presented here provides an accurate and  
101 cost effective approach for large-scale analysis of TRs, which will be useful for researchers to  
102 explore the impact of TR variants on diseases and phenotypes.

103

## 104 **RESULTS**

105 We demonstrate a targeted sequence capture approach combined with Nanopore long-read  
106 sequencing to genotype hundreds of TRs.

107

# 108 Targeted Capture Sequencing of Tandem repeats

109 We performed sequence enrichment of targeted TRs for 7 samples followed by long-read  
110 sequencing using Oxford Nanopore Technologies' MinION as described in Methods. Figure 1a  
111 shows the read length distribution observed in targeted capture sequencing data. The median  
112 read length followed the expected read-length distribution, with the exception of an  
113 under-representation of repeats of length >3kb (Figure 1a). The read length in this study was  
114 sufficient to analyse majority of targeted TRs of length less than 2kb. Sequence coverage  
115 varied across targets and samples, on average 97X sequence coverage was achieved, with only  
116 19 targets having less than 1X coverage (Figure 1b) and majority of the low coverage targets  
117 (16 of the 19 targets) have less than 25% GC content (Supplementary Figure 1)

118

119 Supplementary Table 1 summarises the metrics for targeted sequencing on Nanopore  
120 sequencing technologies. Nanopore multiplexing (See Methods) group 1 samples had similar  
121 yield between samples, however, Nanopore multiplexing group 2 samples had varying yield  
122 per sample. Despite the differences in sequencing yield, we achieved an average of 3062-fold  
123 target enrichment and on target capture rate was approximately 50%.

124

# 125 Genotyping of Tandem repeats using targeted long-read sequencing

126 Genotype estimates from targeted long-read sequencing datasets were estimated using our  
127 tool VNTRTyper [12] with the improvements described in Methods. We also applied  
128 Tandem-genotypes [24] to determine the genotypes of TRs from long-read sequencing data.

We used a minimum of two reads as read threshold to determine the repeat number for each alleles.

Prior to obtaining any sequence data, we generated PCR sizing results as a gold standard on 10 targets for comparison to sequencing analysis. These 10 targets were selected to include various repeat unit length and repeat sequence combinations to assess the accuracy of the genotypes determined from sequencing data. Of these 10 targets, 2 were excluded for comparison as all 7 samples had insufficient number of spanning reads (minimum of 2 reads required for genotyping) to genotype these targets. Genotype estimates from VNTRtyper on these 8 targets correlated well with PCR (Pearson correlation greater than 0.980 for all samples) (Table 1 and Supplementary Figure 2). Genotype estimates by Tandem-genotypes also correlated well with PCR with correlation greater than 0.984 for all samples (Supplementary Table 2 and Supplementary Figure 3), however fewer targets had sufficient data to compare with PCR sizing results.

Genotype estimates from VNTRtyper and Tandem-genotypes for all 142 targets from Nanopore capture sequencing samples are provided in Supplementary Spreadsheets Table 1 and Table 2 respectively. Genotype estimates by VNTRtyper and Tandem-genotypes correlate well and the correlation values range from 0.904 to 0.994 for Nanopore targeted sequencing.

We were able to determine the genotype on average for 60% of the targets (range 48% to 75%) using VNTRtyper and 57% of the targets (range 41% to 74%) using Tandem-genotypes.

Both VNTRTyper and Tandem-genotypes failed to genotype targets with low GC sequence content (< 25% GC content) and targets which are greater than 2Kb in length, which accounts for approximately 22% of the targets (32 of the 142 targets). Targets with low GC sequence content (< 25% GC content) didn't have sufficient sequence coverage for analysis due to inefficient sequence enrichment in these regions (Supplementary Figure 1). Targets which are greater than 2Kb in length didn't have sufficient spanning reads for genotyping analysis (See Methods and Figure 1a).

It was evident that the GC content of the target and size (i.e. repeat length) affected the genotyping efficiency of our targeted capture sequencing approach. Therefore, we assessed the genotyping rate based on the size of the target and GC content of the target (Figure 2). For all 142 targets genotyping rate using VNTRTyper was only 59.8% (Figure 2a), however genotyping rate improved to 67% for 125 targets with a size threshold of 2Kb (Figure 2b) and 67.1% for 125 targets with 25% GC threshold (Figure 2c). Furthermore, genotyping rate improved to 75.2% for 110 targets with a combined 2Kb size threshold and 25% GC threshold (Figure 2d). Also, sample with high sequence coverage (NA12889) had the highest genotyping rate of 90.9% for 110 targets (Supplementary Figure 4). Genotyping rate using Tandem-genotypes also improved to an average of 63.7% for 110 targets (range 43.6% to 85.5%) (Supplementary Figure 5).

Genotyping of Tandem repeats using long-read whole genome sequencing



To investigate the accuracy of genotype estimates of TRs from targeted sequence capture compared to WGS, we performed genotyping analysis on the targeted regions using VNTRTyper and Tandem-genotypes on whole genome long-read sequencing data. We downloaded whole genome long-read Nanopore and PacBio sequencing data on CEPH Pedigree 1463 NA12878 sample. We have previously reported genotyping estimates by VNTRTyper on PacBio NA12878 WGS data [12]. Here we use the genotype estimates by VNTRTyper on PacBio NA12878 WGS data to compare genotype estimates by Tandem-genotype and the results of targeted sequencing analysis.

We compared the accuracy of genotype estimates from WGS data with PCR sizing analysis. Genotype estimates by VNTRTyper and Tandem-genotypes on WGS data were compared with PCR sizing results on 10 targets (Table 2). VNTRTyper and Tandem-genotypes had comparable correlation with PCR sizing analysis for both Nanopore and PacBio WGS. Genotype estimates for all 142 targets from Nanopore and PacBio WGS data determined using VNTRTyper and Tandem-genotypes are provided in Supplementary Spreadsheets Table 3.

We compared the genotype estimates between WGS data and targeted capture sequencing data (77 targets which had results for both WGS and targeted sequencing). Genotype estimates by VNTRTyper between WGS data and targeted capture sequencing data showed a correlation of 0.9782 (correlation on 154 alleles) (Figure 3a). Genotype estimates by Tandem-genotypes had lower correlation between WGS and targeted capture sequencing data

of 0.7694 (correlation on 152 alleles – 76 targets) (Figure 3b). On the subset of 7 targets for which we had generated PCR sizing analysis, Nanopore WGS data correlated with 12/14 genotype estimates on Nanopore capture sequencing using VNTRTyper precisely compared to PCR sizing (Table 2 and Figure 4a). Genotype estimates using Tandem-genotypes on Nanopore WGS data correlated with 11/12 genotype estimates on Nanopore capture sequencing precisely compared to PCR sizing (Figure 4b).

### Variation in Tandem repeats

To assess the extent of variation in repeat numbers between individuals, we compared the genotype estimates to the reported reference (hg19) repeat number. Genotype estimates determined by VNTRTyper on Nanopore capture sequencing on 7 members of CEPH pedigree 1463 were used to assess the variation. We found that for a given sample, on average 51% (range 45% - 60%) of the targets have a genotype which is different to the reference, with more deletions (28%) than duplications (23%) (Figure 5).

## **DISCUSSION**

In this study, we presented a targeted sequencing approach combined with long-read sequencing technology to genotype TRs. To our knowledge, this is the first report on genotyping analysis of hundreds of TRs using targeted long-read sequencing approach. Sequencing reads that span the entire repeat region and flanking region are often useful in providing an accurate estimation of the repeat genotype. Long-read sequencing technologies have the ability to generate reads which can span the entire repeat region and flanking regions.

However, whole genome long-read sequencing analysis is still expensive for large-scale population analysis; hence, we developed a targeted long-read sequencing approach for TR analysis.

We showed that 1) target enrichment of repetitive sequences followed by long-read sequencing is feasible and 2) genotype predictions on targeted TR sequencing are comparable to the accuracy of PCR sizing analysis of repeats. Overall, we achieved an average genotyping rate of 75% for 110 TR loci with repeat length less than 2kb and GC content greater than 25%. Genotyping rate improved to 91% for the highest-coverage sample, indicating more sequencing could improve genotyping rate.

Targets with low GC sequence content (< 25% GC content) didn't have sufficient sequence coverage with targeted sequencing. We have previously performed short-read target capture on these regions [12] and observed low sequence coverage in low GC targets. However, both Nanopore and PacBio WGS data didn't have any bias in sequence coverage in low GC regions. Hence, the lack of sequence coverage in low GC region for targeted sequencing is likely due to the capture protocol. To overcome the issue of low capture efficiency for low GC regions, it is feasible to increase the number of probes in low GC regions during probe design. This will improve sequence enrichment in low GC targets.

We also observed targets greater than 2Kb in length could not be genotyped due to the lack of spanning reads for genotyping analysis. This is primarily due to the limitation in sequence

read length observed from the capture process. Streptavidin beads used during the capture process has limitations on the size of the fragments it can bind to, which limits the fragment length attainable with this capture protocol. Although there are longer TRs (greater than 2Kb) in the human genome, more than 99% of the TRs reported in human reference genome (hg38) are less than 2Kb in length [3]. Therefore, our protocol would still be able to successfully genotype most of the TRs in the human genome. TRs greater than 2Kb might need further optimized enrichment protocols.

Our target panel included 8 (out of the 142 targets) STRs with longer expansions (>200 number of copies) and 7 of these targets failed to genotype. However 3 of these had low GC content and one was greater than 4kb in repeat length. The longer expansions which failed to genotype also had low sequence coverage, however due to the low number of targets we couldn't conclusively identify the cause for failure for these targets.

We used VNTRTyper, an in-house genotyping tool described in Ganesamoorthy et. al. (2018) [12] to determine the repeat number of TRs from long-read sequencing technologies. For comparison, we used Tandem-genotypes [24], recently reported genotyping tool for the detection of TR expansions from long-read sequencing. Both genotyping methods were comparable to PCR sizing analysis and genotyping estimates were comparable between the approaches. However, Tandem-genotypes genotyped less targets than VNTRTyper. The differences is likely due to the different algorithms used between the methods. Both VNTRTyper and Tandem-genotypes uses reads spanning the repeat region. However, for

Tandem-genotypes the flanking length used for analysis is depended on the length of the repeat unit, with a maximum of 100bp on both sides of the repeat unit. On the other hand, VNTRTyper uses a default 30bp flanking length for analysis, but it is feasible to change the flanking length. Due to the longer flank length requirement, Tandem-genotypes could have possibly failed to genotype more targets compared to VNTRTyper.

Variations in TRs are a major source of genomic variation between individuals. TRs targeted in this study were initially selected due to the variation observed between case and control samples for obesity analysis [12] and these TRs are variable in the population. We show that approximately 50% of the targeted TRs differ from reported reference copy number. However, the major limitation in this analysis is that the sample size is small and the individuals are related, which introduces a bias in the analysis. Nevertheless, these findings indicate the possibility of variation in TR copy number between individuals and further large-scale studies are required to ascertain the extent of variation.

We demonstrated that the accuracy of genotype estimates between WGS and targeted capture sequencing were comparable to the accuracy of PCR sizing analysis. However, targeted capture enrichment protocols used in this study have amplification steps, which can introduce errors in TR analysis. This could possibly explain the differences in genotype estimates observed between WGS and targeted capture sequencing for some targets.

An amplification free targeted analysis with long-read sequencing is an ideal option for accurate genotyping TRs. Targeted cleavage with Cas9 enzyme followed by Nanopore sequencing [26] or PacBio sequencing [27] has been recently reported as alternative option for enrichment of regions of interest. This method does not have any amplifications and can be adapted for multiple targets in a single assay. However, currently the DNA input requirements are high and sequencing output are low, which currently restricts wide use of this technique for large-scale analysis.

The targeted long-read sequencing approach presented in this study is a cost-effective approach to analyse hundreds of TRs simultaneously. Long-read Nanopore WGS can cost approximately \$4000 for 30X coverage of human genome and often with varying coverage across the genome. However, targeted long-read sequencing can be performed for a fraction of cost (less than \$300 per sample depending on the multiplexing level) to enrich up to 25MB of genomic sequence of interest. The ability to analyse hundreds of TRs for a fraction of cost allows to explore TRs in large-scale studies.

In summary, we present a targeted approach combined with long-read sequencing to enable cost-effective and accurate approach to genotype TRs using long-read sequencing. Using this method, we have successfully demonstrated the feasibility of targeted capture sequencing of repetitive sequences and genotyping TRs using Nanopore long-read sequencing technology. Our targeted long-read sequencing approach would provide a cost-effective tool for large-scale population analysis of tandem repeats.

303

## 304 **METHODS**

### 305 Samples for sequencing:

306 DNA samples of CEPH/UTAH pedigree 1463 were purchased from Coriell Institute for  
307 Medical Research (USA). Seven family members from the pedigree used for sequencing  
308 analysis were NA12877, NA12878, NA12879, NA12881, NA12882, NA12889 and  
309 NA12890.

310

### 311 Selection of Tandem Repeats and Probe design

312 The selection of TRs and design of probes were described in Ganesamoorthy *et. al.* (2018)  
313 [12]. Briefly, 142 TRs were selected; they range from 112bp to 25236bp in length in the  
314 reference human genome (hg19) and the number of repeat units range from 2 to 2300 repeats.  
315 TRs used in this study were selected as part of another study to investigate association  
316 between TRs and Obesity and these targeted TRs are not disease associated. Agilent  
317 SureSelect DNA design (Agilent Technologies) was used to design target probes to capture  
318 the targeted regions (including 100bp flanking regions) and regions flanking the TRs (at least  
319 1000bp).

320

### 321 Nanopore targeted sequencing of TRs:

322 All 7 family members from the CEPH pedigree 1463 were used for Nanopore targeted  
323 sequencing analysis (NA12877, NA12878, NA12879, NA12881, NA12882, NA12889 and  
324 NA1289). Target sequence capture for Nanopore sequencing was performed using Agilent

325 SureSelect XT HS Target Enrichment System (Agilent Technologies) according to the  
326 manufacturer's instructions with slight modifications. Briefly, 200ng of DNA was fragmented  
327 to 3Kb using Covaris Blue miniTUBE (Covaris). Greater than 90% of the targeted TRs are less  
328 than 3Kb and SureSelect capture protocol works effectively on fragments less than 4Kb in  
329 length; therefore, DNA products were sheared to 3Kb. Fragmented DNA was end repaired,  
330 adapter ligated and amplified prior to target capture. Extension time for pre-capture  
331 amplification was increased to 4 minutes to allow for the amplification of long fragments and  
332 14 cycle amplification was used. Purified pre-capture PCR products were hybridized to the  
333 designed capture probes for 2 hours. Streptavidin beads (Thermo Fisher) were used to pull  
334 down the DNA fragments bound to the probes. Finally, captured DNA was amplified with long  
335 extension time (4 minutes) using Illumina Index adapters provided in the enrichment kit. Post  
336 capture PCR products were purified using 0.8X - 1X AMPure XP beads (Beckman Coulter).

337

338 Nanopore sequencing library preparation was performed using 1D Native barcoding genomic  
339 DNA (with EXP-NBD103 and SQK-LSK108) (Oxford Nanopore Technologies) protocol  
340 according to the manufacturer's instructions with minor modifications. Briefly, 100ng –  
341 200ng of post capture PCR products were end repaired and incubated at 20°C for 15mins and  
342 65°C for 15mins. End repaired products were ligated with unique native barcodes.  
343 Purification steps after end repair and barcode ligation were avoided to minimize the loss of  
344 DNA. Barcoded samples were pooled in equimolar concentrations prior to adapter ligation.  
345 Adapter ligated samples were purified using 0.4X AMPure XP beads (Beckman Coulter).  
346 Samples were split into 2 sequencing groups; NA12877, NA12878, NA12879 and NA12890 –



group 1; NA12881, NA12882 and NA12889 – group 2. Sequencing was performed on MinION sequencer (Oxford Nanopore Technologies) using R9.5 flow cell. Both groups were sequenced for 48 hours. Nanopore sequencing data were base called using Albacore (version 2.2.7) and reads were demultiplexed using Albacore (version 2.2.7) based on the barcode sequences.

### Public data used in the study:

Nanopore WGS data on CEPH Pedigree 1463 sample NA12878 were obtained from Nanopore WGS consortium [28]. PacBio WGS data on NA12878 sample were downloaded from SRA with accession numbers SRX627421 and SRX638310 [29]

### VNTRTyper:

Sequencing reads were mapped to hg19 reference genome using Minimap2 (version 2.13) [30]. For Nanopore sequencing ‘-ax map-ont’ and for PacBio WGS ‘-ax map-pb’ parameters were used. VNTRTyper, our in-house tool described in Ganesamoorthy *et. al.* (2018) [12] was used to genotype TRs from long-read sequencing data. Briefly, VNTRTyper takes advantage of the long-read sequencing to identify the number of repeat units in the TR regions. Firstly, the tool identifies reads that span the repeat region and applies Hidden Markov Models (HMM) to align the repetitive portion of each read to the repeat unit. Then it estimates the multiplicity of the repeat units in a read using a profile HMM.

Recently, we further improved the accuracy of genotyping estimates by clustering the copy

number counts from reads to identify the likely genotypes per target. We used Kmeans clustering and the number of clusters are fixed at two clusters for two alleles. A minimum threshold of two supporting reads per genotype was used to assign genotypes. Furthermore, for heterozygous alleles, both alleles should have at least 10% of reads supporting the allele, if not allele with less than 10% of reads was excluded during the analysis. The updated version of VNTRTyper can be accessed from GitHub Japsa release 1.9-3c and can be deployed using script name jsa.tr.longreads. Details of VNTRTyper analysis are previously reported in Ganesamoorthy *et. al.* (2018) [12].

### Tandem-genotypes:

We also used another independent method Tandem-genotypes to estimate genotypes from long-read sequencing data. Tandem-genotypes was recently reported for analysis of TR genotypes from long-read sequencing data [24] and it can be utilised for both Nanopore and PacBio sequencing technologies.

Nanopore and PacBio sequencing data were mapped to the hg19 reference genome using LAST v959 [31]. Calculation of repeat length per sequencing read was performed with Tandem-genotypes as reported in Mitsuhashi *et. al.* (2019) [24]. Copy number changes in reads covering the repeat's forward and reverse strands were merged and the two alleles with the highest number of supporting reads for each VNTR were extracted. A minimum threshold of two supporting reads per genotype was used to assign genotypes.

### 391 PCR analysis of VNTRs:

392 Ten targeted VNTR regions which are less than 1Kb in repetitive sequence were validated by  
 393 PCR sizing analysis in this study. These ten targets include various repeat unit length and  
 394 repeat sequence combinations to assess the accuracy of the genotypes determined from  
 395 sequencing data. Majority of these targets were tested in our previous study [12] and the results  
 396 from the previous PCR analysis were used for these regions. PCRs were performed using  
 397 HotStar Taq DNA Polymerase (Qiagen) and PCR conditions were optimized for each PCR  
 398 target. PCR products were purified and subjected to capillary electrophoresis on an  
 399 ABI3500xL Genetic Analyzer (Applied BioSystems). Fragment sizes were analyzed using  
 400 GeneMapper 4.0 (Applied BioSystems).

401

### 402 Statistical analysis:

403 Linear regression analysis was used to determine correlation between genotype estimates. All  
 404 plots were generated using GraphPad Prism (version 7.00 for Windows, GraphPad Software,  
 405 La Jolla California USA).

406

407 We investigated the effect of GC content, repeat length, repeat period and repeat copy number  
 408 on target sequencing depth using a multivariate linear regression model. We used ggplot to  
 409 visualize the relationship between these factors and sequencing depth across all 7 samples.  
 410 Thresholds on GC and repeat length were chosen based on this visual analysis. Genotype rate  
 411 was calculated as the proportion of sample, target pairs which had a predicted genotyped  
 412 (based on VNTRtyper) amongst all targets which met the GC and repeat length thresholds.

413

## 414 **AVAILABILITY OF DATA AND MATERIALS**

415 The sequencing datasets generated during the study are available in NCBI SRA repository,  
416 project number PRJNA422490.

417

## 418 **ACKNOWLEDGEMENTS**

419 This work was supported by the Australian Government National Health and Medical  
420 Research Council Project Grant APP1052303 to Prof Lachlan JM Coin. We thank Agilent  
421 Technologies for their technical assistance with targeted sequencing experiments.

422

## 423 **AUTHORS' CONTRIBUTIONS:**

424 DG and LC conceived the study. DG, MY and TD performed the experiments. DG, MY,  
425 VM, CZ, MDC and LC performed the sequencing and statistical analysis. DG and MY wrote  
426 the paper with input from the other authors. All authors read and approved the final  
427 manuscript.

428

## 429 **DISCLOSURE DECLARATION**

430 The authors declare no competing interests.

431

## 432 **SUPPLEMENTAL DATA**

433 Supplementary.pdf: Includes Supplementary Figures 1 – 5 and Supplementary Table 1-2

434 Supplementary\_Spreadsheets.xls: Includes Tables 1 – 3

## REFERENCES:

1. Lander ES, Linton LM, Birren B, Nusbaum C, Zody MC, Baldwin J, Devon K, Dewar K, Doyle M, FitzHugh W, et al: **Initial sequencing and analysis of the human genome.** *Nature* 2001, **409**:860-921.
2. Jurka J, Kapitonov VV, Kohany O, Jurka MV: **Repetitive sequences in complex genomes: structure and evolution.** *Annu Rev Genomics Hum Genet* 2007, **8**:241-259.
3. Gelfand Y, Rodriguez A, Benson G: **TRDB--the Tandem Repeats Database.** *Nucleic Acids Res* 2007, **35**:D80-87.
4. Gemayel R, Cho J, Boeynaems S, Verstrepen KJ: **Beyond junk-variable tandem repeats as facilitators of rapid evolution of regulatory and coding sequences.** *Genes* 2012, **3**:461-480.
5. Armour JA: **Tandemly repeated DNA: why should anyone care?** *Mutat Res* 2006, **598**:6-14.
6. Hannan AJ: **TRPing up the genome: Tandem repeat polymorphisms as dynamic sources of genetic variability in health and disease.** *Discov Med* 2010, **10**:314-321.
7. Gemayel R, Vences MD, Legendre M, Verstrepen KJ: **Variable tandem repeats accelerate evolution of coding and regulatory sequences.** *Annual review of genetics* 2010, **44**:445-477.
8. Bidwell JL, Bignon JD: **DNA-RFLP methods and interpretation scheme for**

- 457        **HLA-DR and DQ typing.** *Eur J Immunogenet* 1991, **18**:5-22.
- 458    9.        Tagliabracci A, Buscemi L, Sassaroli C, Paoli M, Rodriguez D: **Allele typing of short**  
459        **tandem repeats by capillary electrophoresis.** *Int J Legal Med* 1999, **113**:26-32.
- 460    10.        Bahlo M, Bennett MF, Degorski P, Tankard RM, Delatycki MB, Lockhart PJ: **Recent**  
461        **advances in the detection of repeat expansions with short-read next-generation**  
462        **sequencing.** *F1000Res* 2018, **7**.
- 463    11.        Duitama J, Zablotskaya A, Gemayel R, Jansen A, Belet S, Vermeesch JR, Verstrepen  
464        KJ, Froyen G: **Large-scale analysis of tandem repeat variability in the human**  
465        **genome.** *Nucleic acids research* 2014, **42**:5728-5741.
- 466    12.        Ganesamoorthy D, Cao MD, Duarte T, Chen W, Coin L: **GtTR: Bayesian estimation**  
467        **of absolute tandem repeat copy number using sequence capture and high**  
468        **throughput sequencing.** *BMC Bioinformatics* 2018, **19**:267.
- 469    13.        Gymrek M, Golan D, Rosset S, Erlich Y: **lobSTR: A short tandem repeat profiler**  
470        **for personal genomes.** *Genome Res* 2012, **22**:1154-1162.
- 471    14.        Highnam G, Franck C, Martin A, Stephens C, Puthige A, Mittelman D: **Accurate**  
472        **human microsatellite genotypes from high-throughput resequencing data using**  
473        **informed error profiles.** *Nucleic Acids Res* 2013, **41**:e32.
- 474    15.        Cao MD, Tasker E, Willadsen K, Imelfort M, Vishwanathan S, Sureshkumar S,  
475        Balasubramanian S, Boden M: **Inferring short tandem repeat variation from**  
476        **paired-end short reads.** *Nucleic Acids Res* 2014, **42**:e16.
- 477    16.        Willems T, Zielinski D, Yuan J, Gordon A, Gymrek M, Erlich Y: **Genome-wide**  
478        **profiling of heritable and de novo STR variations.** *Nat Methods* 2017, **14**:590-592.

- 479 17. Dashnow H, Lek M, Phipson B, Halman A, Sadedin S, Lonsdale A, Davis M, Lamont  
480 P, Clayton JS, Laing NG, et al: **STretch: detecting and discovering pathogenic**  
481 **short tandem repeat expansions.** *Genome Biol* 2018, **19**:121.
- 482 18. Dolzhenko E, van Vugt J, Shaw RJ, Bekritsky MA, van Blitterswijk M, Narzisi G,  
483 Ajay SS, Rajan V, Lajoie BR, Johnson NH, et al: **Detection of long repeat**  
484 **expansions from PCR-free whole-genome sequence data.** *Genome Res* 2017,  
485 **27**:1895-1903.
- 486 19. Mousavi N, Shleizer-Burko S, Yanicky R, Gymrek M: **Profiling the genome-wide**  
487 **landscape of tandem repeat expansions.** *Nucleic Acids Res* 2019, **47**:e90.
- 488 20. Schule B, McFarland KN, Lee K, Tsai YC, Nguyen KD, Sun C, Liu M, Byrne C,  
489 Gopi R, Huang N, et al: **Parkinson's disease associated with pure ATXN10 repeat**  
490 **expansion.** *NPJ Parkinsons Dis* 2017, **3**:27.
- 491 21. De Roeck A, De Coster W, Bossaerts L, Cacace R, De Pooter T, Van Dongen J,  
492 D'Hert S, De Rijk P, Strazisar M, Van Broeckhoven C, Sleegers K: **Accurate**  
493 **characterization of expanded tandem repeat length and sequence through whole**  
494 **genome long-read sequencing on PromethION.** *bioRxiv* 2018:439026.
- 495 22. Ebbert MTW, Farrugia SL, Sens JP, Jansen-West K, Gendron TF, Prudencio M,  
496 McLaughlin IJ, Bowman B, Seetin M, DeJesus-Hernandez M, et al: **Long-read**  
497 **sequencing across the C9orf72 'GGGGCC' repeat expansion: implications for**  
498 **clinical use and genetic discovery efforts in human disease.** *Mol Neurodegener*  
499 **2018, 13**:46.
- 500 23. Liu Q, Zhang P, Wang D, Gu W, Wang K: **Interrogating the "unsequenceable"**

501        **genomic trinucleotide repeat disorders by long-read sequencing.** *Genome Med*  
502        2017, **9**:65.

503    24.    Mitsuhashi S, Frith MC, Mizuguchi T, Miyatake S, Toyota T, Adachi H, Oma Y, Kino  
504        Y, Mitsuhashi H, Matsumoto N: **Tandem-genotypes: robust detection of tandem**  
505        **repeat expansions from long DNA reads.** *Genome Biol* 2019, **20**:58.

506    25.    Karamitros T, Magiorkinis G: **Multiplexed Targeted Sequencing for Oxford**  
507        **Nanopore MinION: A Detailed Library Preparation Procedure.** *Methods Mol Biol*  
508        2018, **1712**:43-51.

509    26.    Gilpatrick T, Lee I, Graham JE, Raimondeau E, Bowen R, Heron A, Sedlazeck FJ,  
510        Timp W: **Targeted Nanopore Sequencing with Cas9 for studies of methylation,**  
511        **structural variants and mutations.** *bioRxiv* 2019:604173.

512    27.    Hafford-Tear NJ, Tsai YC, Sadan AN, Sanchez-Pintado B, Zarouchlioti C, Maher GJ,  
513        Liskova P, Tuft SJ, Hardcastle AJ, Clark TA, Davidson AE: **CRISPR/Cas9-targeted**  
514        **enrichment and long-read sequencing of the Fuchs endothelial corneal**  
515        **dystrophy-associated TCF4 triplet repeat.** *Genet Med* 2019.

516    28.    Jain M, Koren S, Miga KH, Quick J, Rand AC, Sasani TA, Tyson JR, Beggs AD,  
517        Dilthey AT, Fiddes IT, et al: **Nanopore sequencing and assembly of a human**  
518        **genome with ultra-long reads.** *Nat Biotechnol* 2018, **36**:338-345.

519    29.    Pendleton M, Sebra R, Pang AW, Ummat A, Franzen O, Rausch T, Stutz AM,  
520        Stedman W, Anantharaman T, Hastie A, et al: **Assembly and diploid architecture of**  
521        **an individual human genome via single-molecule technologies.** *Nat Methods* 2015,  
522        **12**:780-786.



- 523 30. Li H: **Minimap2: pairwise alignment for nucleotide sequences.** *Bioinformatics*  
524 2018, **34**:3094-3100.
- 525 31. Kielbasa SM, Wan R, Sato K, Horton P, Frith MC: **Adaptive seeds tame genomic**  
526 **sequence comparison.** *Genome Res* 2011, **21**:487-493.
- 527

# FIGURES

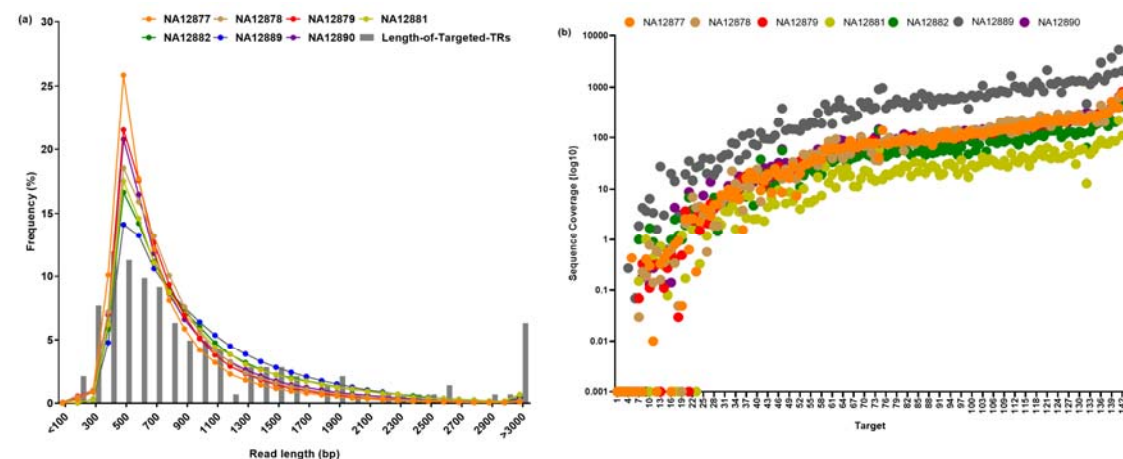

**Figure 1:** Read length and sequence coverage distribution (a) Read length distribution of Nanopore targeted sequencing. Lines indicates the read length distribtuion for each sample and grey bars indicate the length distribution of targeted TRs and (b) Sequence coverage distribution of Nanopore targeted sequencing for all 7 samples.

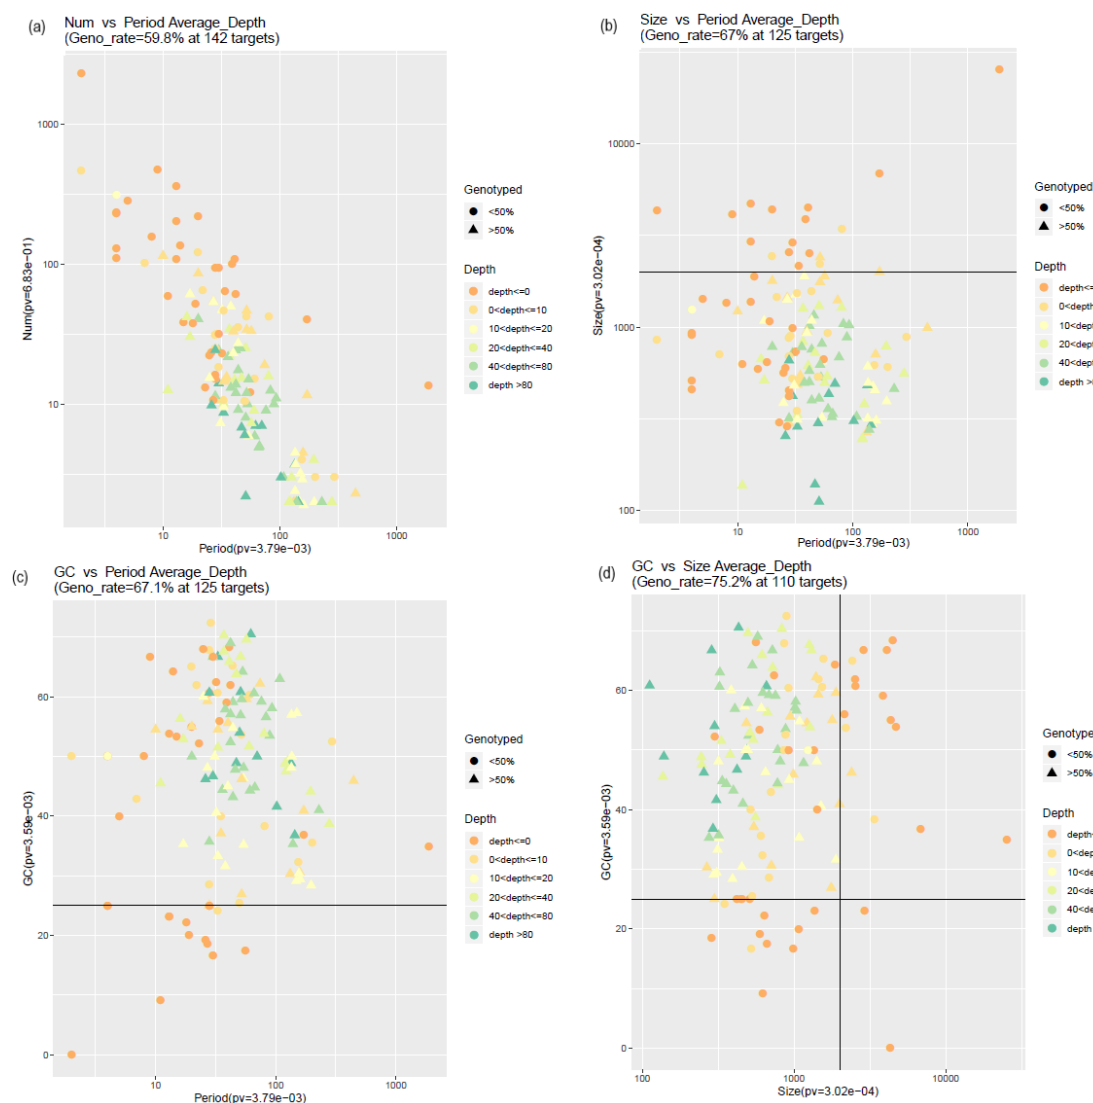

**Figure 2:** Assessment of genotyping rate using VNTRTyper based on the size and GC content of the target for all 7 samples. Triangle indicates that greater than 50% of the samples had a genotyping estimate and circle indicates only less than 50% of the samples had a genotyping estimate for the given target. Colours indicate the depth, which is defined as the number of spanning reads detected for the target region. Black thick lines inside the plots indicate the 2Kb size threshold and 25% GC content size threshold. (a) genotyping rate for all targets, shown as repeat number vs period (i.e. repeat unit), (b) genotyping rate with 2Kb size

threshold, (c) genotyping rate with 25% GC threshold and (d) genotyping rate with both 25% GC threshold and 2Kb size threshold.

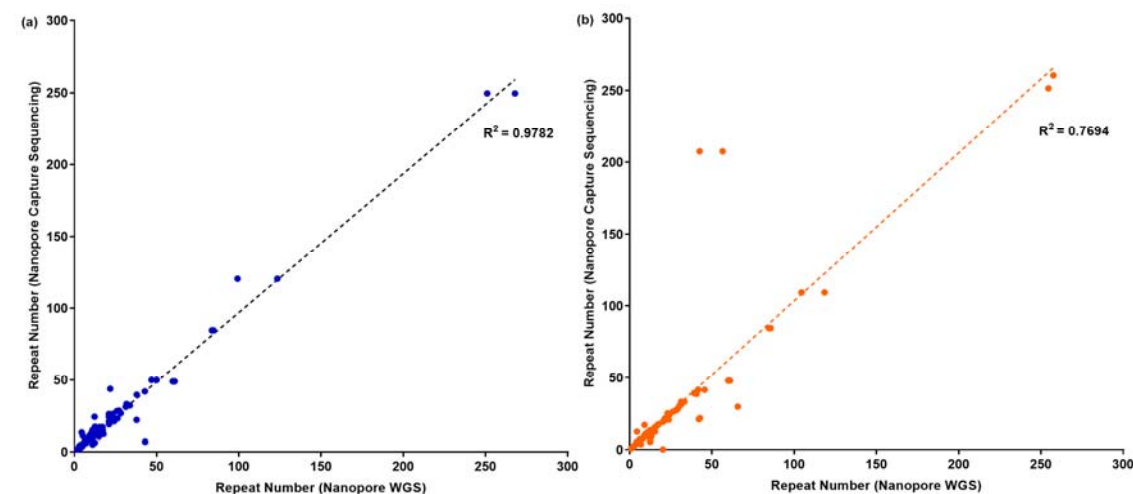

**Figure 3:** Correlation between WGS and Targeted sequencing genotype estimates using (a) VNTRTyper and (b) Tandem-genotypes for NA12878 sample.

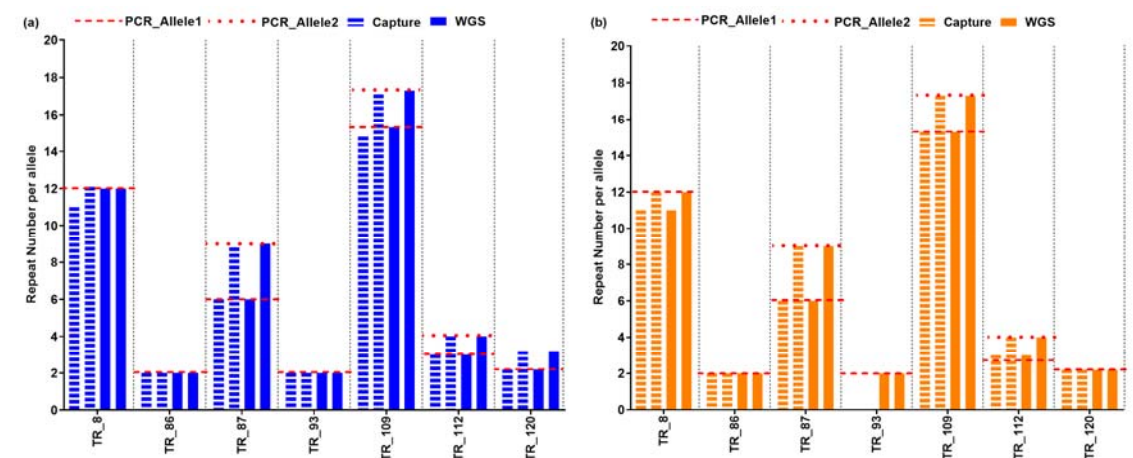

**Figure 4:** Comparison of genotype estimates between WGS and Target capture sequencing for NA12878 sample using (a) VNTRTyper and (b) Tandem-genotypes. Red line indicates PCR sizing results. Targets with no genotype estimates are shown as a gap for the corresponding column.

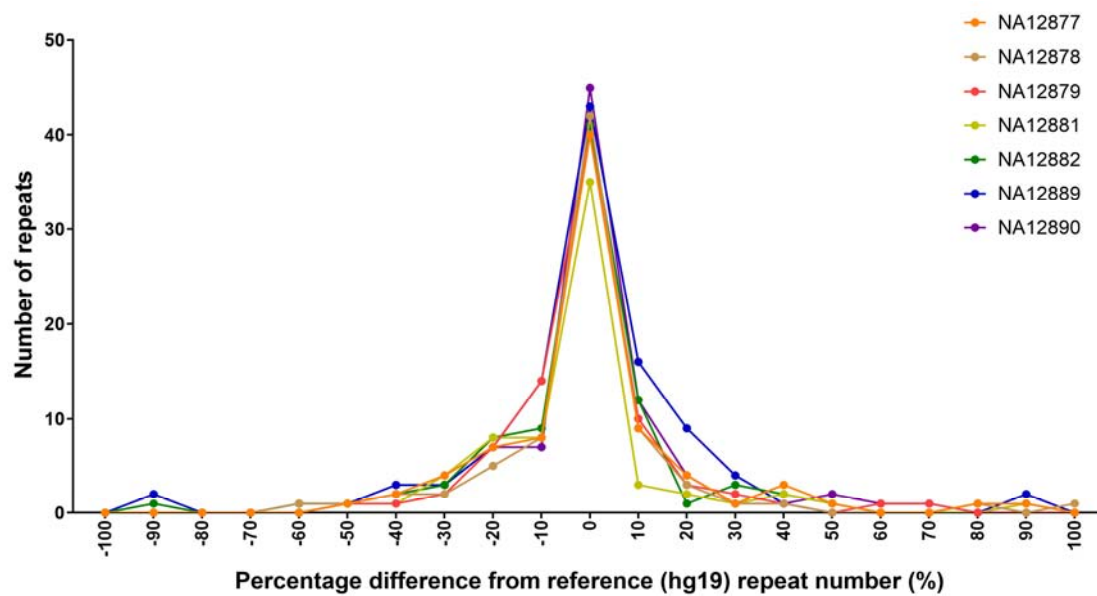

**Figure 5:** Percentage difference between reported repeat number in reference genome (hg19) and estimated repeat number based on genotype estimates using VNTRTyper on Nanopore targeted sequencing.

561 **Table 1:** Genotype estimates on Nanopore targeted capture sequencing using VNTRTyper

| Sample  | Method   | Genotype of Target* |                 |                |                |                |                  |                 |                 | Pearson<br>Correlation<br>with PCR |
|---------|----------|---------------------|-----------------|----------------|----------------|----------------|------------------|-----------------|-----------------|------------------------------------|
|         |          | TR_8<br>(12.0)      | TR_57<br>(15.6) | TR_86<br>(2.0) | TR_87<br>(9.0) | TR_93<br>(2.0) | TR_109<br>(15.3) | TR_112<br>(4.0) | TR_120<br>(2.2) |                                    |
| NA12877 | PCR      | 12.0/13.0           | 10.6/13.6       | 2.0/2.0        | 6.0/8.0        | 2.0/2.0        | 15.3/17.3        | 3.0/4.0         | 2.2/2.2         | 0.9988                             |
|         | Nanopore | 12.0/13.0           | ND              | 2.0/2.0        | 6.2/8.4        | 2.0/2.0        | 15.3/17.3        | 3.0/4.1         | 2.2/3.2         |                                    |
| NA12878 | PCR      | 12.0/12.0           | 10.6/12.6       | 2.0/2.0        | 6.0/9.0        | 2.0/2.0        | 15.3/17.3        | 3.0/4.0         | 2.2/2.2         | 0.9978                             |
|         | Nanopore | 11.0/12.1           | ND              | 2.0/2.0        | 6.0/8.8        | 2.0/2.0        | 14.8 /17.1       | 3.0/4.0         | 2.2/3.2         |                                    |
| NA12879 | PCR      | 12.0/13.0           | 10.6/10.6       | 2.0/2.0        | 8.0/9.0        | 2.0/2.0        | 15.3/17.3        | 3.0/3.0         | 2.2/2.2         | 0.9927                             |
|         | Nanopore | 12.4/12.4           | 10.6/10.6       | 2.0/2.0        | 6.0/8.6        | 2.0/2.0        | 14.8/16.9        | 3.0/4.0         | 2.2/3.2         |                                    |
| NA12881 | PCR      | 12.0/12.0           | 10.6/10.6       | 2.0/2.0        | 8.0/9.0        | 2.0/2.0        | 15.3/15.3        | 3.0/4.0         | 2.2/2.2         | 0.9944                             |
|         | Nanopore | 12.0/12.0           | 10.6/10.6       | 2.0/2.0        | 8.0/9.0        | ND             | 15.3/17.3        | 3.0/4.0         | 2.2/3.2         |                                    |
| NA12882 | PCR      | 12.0/13.0           | 10.6/10.6       | 2.0/2.0        | 6.0/6.0        | 2.0/2.0        | 15.3/17.3        | 3.0/3.0         | 2.2/2.2         | 0.9919                             |
|         | Nanopore | 11.8/13.0           | 10.6/10.6       | 2.0/2.0        | 6.0/8.5        | 2.0/2.0        | 15.3/17.3        | 3.0/4.0         | 2.2/3.2         |                                    |
| NA12889 | PCR      | 12.0/12.0           | 13.6/17.6       | 2.0/2.0        | 8.0/8.0        | 2.0/2.0        | 17.3/17.3        | 4.0/4.0         | 2.2/2.2         | 0.9800                             |
|         | Nanopore | 12.1/12.1           | 10.6/15.8       | 2.0/2.0        | 6.1/8.1        | 2.0/2.0        | 14.8/17.2        | 3.0/4.0         | 2.2/3.2         |                                    |
| NA12890 | PCR      | 12.0/13.0           | 10.6/10.6       | 2.0/2.0        | 6.0/9.0        | 2.0/2.0        | 15.3/15.3        | 3.0/3.0         | 2.2/2.2         | 0.9936                             |
|         | Nanopore | 12.2/12.2           | 10.6/10.6       | 2.0/2.0        | 6.0/9.0        | 2.0/2.0        | 13.3/15.3        | 3.0/4.0         | 2.2/3.2         |                                    |

562 \*Repeat Number in reference hg19 is provided within brackets for each target

563 \*Repeat numbers that do not agree with PCR results are highlighted in red.

564 ND – Sufficient data not available for genotype analysis

**Table 2:** Genotype estimates on NA12878 WGS and Capture sequencing data using VNTRTyper and Tandem-genotypes

| Method^ | Genotype of Target* |                 |                 |                 |                |                |                |                  |                 |                 | Pearson<br>Correlation<br>with PCR |
|---------|---------------------|-----------------|-----------------|-----------------|----------------|----------------|----------------|------------------|-----------------|-----------------|------------------------------------|
|         | TR_8<br>(12.0)      | TR_32<br>(38.4) | TR_57<br>(15.6) | TR_64<br>(18.3) | TR_86<br>(2.0) | TR_87<br>(9.0) | TR_93<br>(2.0) | TR_109<br>(15.3) | TR_112<br>(6.0) | TR_120<br>(2.2) |                                    |
| PCR     | 12.0/12.0           | 9.4/10.4        | 10.6/12.6       | 17.3/18.3       | 2.0/2.0        | 6.0/9.0        | 2.0/2.0        | 15.3/17.3        | 3.0/4.0         | 2.2/2.2         |                                    |
| NPW_VT  | 12.0/12.0           | 8.2/10.7        | 10.6/12.6       | 17.3/18.6       | 2.0/2.0        | 6.0/9.0        | 2.0/2.0        | 15.3/17.3        | 3.0/4.0         | 2.2/3.2         | 0.9980                             |
| NPW_TG  | 11.0/12.0           | 4.4/9.4         | 10.6/12.6       | 18.3/19.3       | 2.0/2.0        | 6.0/9.0        | 2.0/2.0        | 15.3/17.3        | 3.0/4.0         | 2.2/2.2         | 0.9800                             |
| PBW_VT  | 12.0/12.0           | 11.0/12.4       | 10.6/12.6       | 18.3/19.3       | 2.0/2.0        | 6.0/9.0        | 2.0/2.0        | 15.3/17.3        | 3.0/4.0         | 2.2/2.2         | 0.9957                             |
| PBW_TG  | 12.0/12.0           | ND              | 12.6/12.6       | ND              | 2.0/2.0        | ND             | 2.0/2.0        | 15.3/15.3        | 4.0/4.0         | 2.2/2.2         | 0.9900                             |
| NPC_VT  | 11.0/12.1           | ND              | ND              | ND              | 2.0/2.0        | 6.0/8.8        | 2.0/2.0        | 14.8/17.1        | 3.0/4.0         | 2.2/3.2         | 0.9978                             |
| NPC_TG  | 11.0/12.0           | ND              | ND              | ND              | 2.0/2.0        | 6.0/9.0        | ND             | 15.3/17.3        | 3.0/4.0         | 2.2/2.2         | 0.9988                             |

^NPW\_VT – Nanopore WGS VNTRTyper; NPW\_TG – Nanopore WGS Tandem-genotypes; PBW\_VT – PacBio WGS VNTRTyper; PBW\_TG – PacBio WGS Tandem-genotypes; NPC\_VT – Nanopore Capture sequencing VNTRTyper; NPC\_TG – Nanopore Capture sequencing Tandem-genotypes

\*Repeat Number in reference hg19 is provided within brackets for each target

\*Repeat numbers that do not agree with PCR results are highlighted in red.

ND – Sufficient data not available for genotype analysis
